# Supplementary material
Source: PubMed Central journal article supplement (PMC3408587)
Supplement: NIHMS386940-supplement-01.pdf [file NIHMS386940-supplement-01.pdf]

**Table S1:** The top 20 most abundant lncRNAs in mouse liver (A) and cortex (B)

| <b>A</b>  |               |             |                   | <b>B</b>  |               |             |                   |
|-----------|---------------|-------------|-------------------|-----------|---------------|-------------|-------------------|
| gene id   | gene symbol   | exon length | WT average (FPKM) | gene id   | gene symbol   | exon length | WT average (FPKM) |
| 71661     | 0610005C13Rik | 1122        | 200.7             | 17263     | Meg3          | 12906       | 527.8             |
| 72289     | Malat1        | 6982        | 109.0             | 347740    | 2900097C17Rik | 4917        | 213.9             |
| 791299    | Gm10069       | 4598        | 105.4             | 72289     | Malat1        | 6982        | 199.0             |
| 399101    | Snhg3         | 437         | 91.9              | 75745     | Rian          | 3579        | 179.0             |
| 105364    | AW495222      | 950         | 84.7              | 76992     | 1700066J24Rik | 708         | 88.8              |
| 791347    | Gm10007       | 450         | 55.7              | 75501     | 1700010K23Rik | 376         | 76.2              |
| 73824     | Snhg6         | 407         | 53.5              | 66602     | 1700020I14Rik | 1549        | 73.4              |
| 69221     | 2410006H16Rik | 461         | 53.1              | 330166    | Miat          | 8760        | 70.9              |
| 100038628 | Gm10768       | 2043        | 48.7              | 353342    | Peg13         | 4725        | 56.9              |
| 83673     | Snhg1         | 476         | 48.7              | 100169889 | Peg3as        | 865         | 54.0              |
| 75954     | 5033403H07Rik | 479         | 45.4              | 69338     | 1700003D09Rik | 1389        | 53.5              |
| 664779    | U05342        | 3350        | 40.6              | 329427    | LOC329427     | 2707        | 53.4              |
| 100038464 | Gm15441       | 1673        | 39.9              | 80515     | A030009H04Rik | 1779        | 52.3              |
| 74161     | 1300015D01Rik | 3476        | 38.3              | 213742    | Xist          | 17918       | 45.5              |
| 66961     | Neat1_1       | 3177        | 36.1              | 268755    | A930011O12Rik | 4039        | 42.4              |
| 100134861 | BC090627      | 4527        | 34.4              | 69221     | 2410006H16Rik | 461         | 42.3              |
| 100502959 | AV051173      | 624         | 33.6              | 77124     | 9130221H12Rik | 1542        | 41.7              |
| 100042498 | 2210403K04Rik | 1766        | 33.2              | 100043072 | A230070E04Rik | 1851        | 40.2              |
| 14455     | Gas5          | 2554        | 30.5              | 319752    | B230209E15Rik | 2058        | 39.1              |
| 68386     | 0610039K10Rik | 951         | 29.2              | 66297     | 2610017I09Rik | 546         | 38.5              |
